# Supplementary material for: Comparative genome-based identification of a cell wall-anchored protein from Lactobacillus plantarum increases adhesion of Lactococcus lactis to human epithelial cells
Source: PubMed Central journal article supplement (PMC4572922; doi:10.1038/srep14109), 2015-09-15
Supplement: srep14109-s1.pdf [file srep14109-s1.pdf]

## Supplementary Information

### **Comparative genome-based identification of a cell wall-anchored protein from *Lactobacillus plantarum* increases adhesion of *Lactococcus lactis* to human epithelial cells**

Bo Zhang<sup>1</sup>, Fanglei Zuo<sup>1</sup>, Rui Yu<sup>1</sup>, Zhu Zeng<sup>1</sup>, Huiqin Ma<sup>2</sup>, Shangwu Chen<sup>1\*</sup>

<sup>1</sup> *Key Laboratory of Functional Dairy, College of Food Science and Nutritional Engineering, China Agricultural University, Beijing, P. R. China*

<sup>2</sup> *College of Agriculture and Biotechnology, China Agricultural University, Beijing, China*

\*Corresponding author. Mailing address for Shangwu Chen: College of Food Science and Nutritional Engineering, China Agricultural University, No. 17 Qinghua East Road, Hai-dian District, Beijing 100083, China. Phone: (86)1062738663. Fax: (86)1062738663. E-mail: swchen@cau.edu.cn.

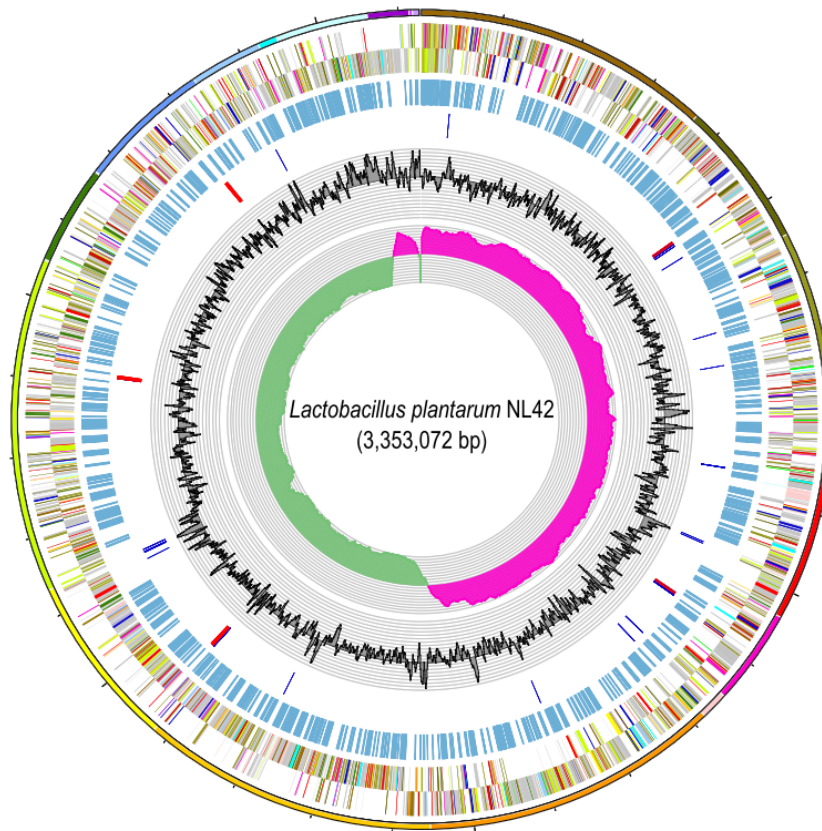

**Fig. S1** Genome map of *Lt. plantarum* NL42. The circles from inside to outside indicate: GC skew (ring 1); GC content (ring 2); RNA genes (ring 3); KEGG-annotated enzymes (ring 4); COG-annotated coding sequences (rings 5 and 6) and genome sequence (ring 7, each tick indicates 100 kb). The order of the contigs was arranged according to *Lt. plantarum* WCFS1.

|            |    | Percent Identity |      |       |       |       |       |       |       |       |      |       |      |      |      |       |       |      |      |       |       |       |    |            |
|------------|----|------------------|------|-------|-------|-------|-------|-------|-------|-------|------|-------|------|------|------|-------|-------|------|------|-------|-------|-------|----|------------|
|            |    | 1                | 2    | 3     | 4     | 5     | 6     | 7     | 8     | 9     | 10   | 11    | 12   | 13   | 14   | 15    | 16    | 17   | 18   | 19    | 20    | 21    |    |            |
| Divergence | 1  | ■                | 99.9 | 99.9  | 99.9  | 99.9  | 100.0 | 100.0 | 100.0 | 99.9  | 99.5 | 100.0 | 99.9 | 99.9 | 99.9 | 99.9  | 99.9  | 99.5 | 99.9 | 100.0 | 100.0 | 99.9  | 1  | JDM1       |
|            | 2  | 0.1              | ■    | 100.0 | 100.0 | 100.0 | 99.9  | 99.9  | 99.9  | 100.0 | 99.6 | 99.9  | 99.9 | 99.9 | 99.9 | 100.0 | 100.0 | 99.4 | 99.8 | 99.9  | 99.9  | 100.0 | 2  | Lp90       |
|            | 3  | 0.1              | 0.0  | ■     | 100.0 | 100.0 | 99.9  | 99.9  | 99.9  | 100.0 | 99.6 | 99.9  | 99.9 | 99.9 | 99.9 | 100.0 | 100.0 | 99.4 | 99.8 | 99.9  | 99.9  | 100.0 | 3  | LP91       |
|            | 4  | 0.1              | 0.0  | 0.0   | ■     | 100.0 | 99.9  | 99.9  | 99.9  | 100.0 | 99.6 | 99.9  | 99.9 | 99.9 | 99.9 | 100.0 | 100.0 | 99.4 | 99.8 | 99.9  | 99.9  | 100.0 | 4  | NC8        |
|            | 5  | 0.1              | 0.0  | 0.0   | 0.0   | ■     | 99.9  | 99.9  | 99.9  | 100.0 | 99.6 | 99.9  | 99.9 | 99.9 | 99.9 | 100.0 | 100.0 | 99.4 | 99.8 | 99.9  | 99.9  | 100.0 | 5  | NL42       |
|            | 6  | 0.0              | 0.1  | 0.1   | 0.1   | 0.1   | ■     | 100.0 | 100.0 | 99.9  | 99.5 | 100.0 | 99.9 | 99.9 | 99.9 | 99.9  | 99.9  | 99.5 | 99.9 | 100.0 | 100.0 | 99.9  | 6  | P8         |
|            | 7  | 0.0              | 0.1  | 0.1   | 0.1   | 0.1   | 0.0   | ■     | 100.0 | 99.9  | 99.5 | 100.0 | 99.9 | 99.9 | 99.9 | 99.9  | 99.9  | 99.5 | 99.9 | 100.0 | 100.0 | 99.9  | 7  | ST-III     |
|            | 8  | 0.0              | 0.1  | 0.1   | 0.1   | 0.1   | 0.0   | 0.0   | ■     | 99.9  | 99.5 | 100.0 | 99.9 | 99.9 | 99.9 | 99.9  | 99.9  | 99.5 | 99.9 | 100.0 | 100.0 | 99.9  | 8  | UCMA_3037  |
|            | 9  | 0.1              | 0.0  | 0.0   | 0.0   | 0.0   | 0.1   | 0.1   | 0.1   | ■     | 99.6 | 99.9  | 99.9 | 99.9 | 99.9 | 100.0 | 100.0 | 99.4 | 99.8 | 99.9  | 99.9  | 100.0 | 9  | WCFS1      |
|            | 10 | 0.1              | 0.1  | 0.1   | 0.1   | 0.1   | 0.1   | 0.1   | 0.1   | 0.1   | ■    | 99.5  | 99.5 | 99.5 | 99.5 | 99.6  | 99.5  | 98.9 | 99.4 | 99.5  | 99.5  | 99.6  | 10 | WHE_92     |
|            | 11 | 0.0              | 0.1  | 0.1   | 0.1   | 0.1   | 0.0   | 0.0   | 0.0   | 0.1   | 0.1  | ■     | 99.9 | 99.9 | 99.9 | 99.9  | 99.9  | 99.5 | 99.9 | 100.0 | 100.0 | 99.9  | 11 | wikim18    |
|            | 12 | 0.1              | 0.1  | 0.1   | 0.1   | 0.1   | 0.1   | 0.1   | 0.1   | 0.1   | 0.2  | 0.1   | ■    | 99.9 | 99.8 | 99.9  | 99.9  | 99.5 | 99.8 | 99.9  | 99.9  | 99.9  | 12 | ZJ316      |
|            | 13 | 0.1              | 0.1  | 0.1   | 0.1   | 0.1   | 0.1   | 0.1   | 0.1   | 0.1   | 0.2  | 0.1   | 0.1  | ■    | 99.8 | 99.9  | 99.9  | 99.4 | 99.8 | 99.9  | 99.9  | 99.9  | 13 | 16         |
|            | 14 | 0.1              | 0.1  | 0.1   | 0.1   | 0.1   | 0.1   | 0.1   | 0.1   | 0.1   | 0.1  | 0.2   | 0.2  | 0.2  | ■    | 99.9  | 99.9  | 99.4 | 99.7 | 99.9  | 99.9  | 99.9  | 14 | 19L3       |
|            | 15 | 0.1              | 0.0  | 0.0   | 0.0   | 0.0   | 0.1   | 0.1   | 0.1   | 0.0   | 0.1  | 0.1   | 0.1  | 0.1  | 0.1  | ■     | 100.0 | 99.4 | 99.8 | 99.9  | 99.9  | 100.0 | 15 | AG30       |
|            | 16 | 0.1              | 0.0  | 0.0   | 0.0   | 0.0   | 0.1   | 0.1   | 0.1   | 0.0   | 0.1  | 0.1   | 0.1  | 0.1  | 0.1  | 0.0   | ■     | 98.5 | 99.8 | 99.9  | 99.9  | 100.0 | 16 | ATCC_14917 |
|            | 17 | 0.2              | 0.3  | 0.3   | 0.3   | 0.3   | 0.2   | 0.2   | 0.2   | 0.3   | 0.3  | 0.2   | 0.1  | 0.3  | 0.3  | 0.3   | 0.6   | ■    | 99.4 | 99.5  | 99.5  | 99.4  | 17 | AY01       |
|            | 18 | 0.1              | 0.2  | 0.2   | 0.2   | 0.2   | 0.1   | 0.1   | 0.1   | 0.2   | 0.3  | 0.1   | 0.2  | 0.2  | 0.3  | 0.2   | 0.2   | 0.3  | ■    | 99.9  | 99.9  | 99.8  | 18 | EGD-AQ4    |
|            | 19 | 0.0              | 0.1  | 0.1   | 0.1   | 0.1   | 0.0   | 0.0   | 0.0   | 0.1   | 0.1  | 0.0   | 0.1  | 0.1  | 0.1  | 0.1   | 0.1   | 0.2  | 0.1  | ■     | 100.0 | 99.9  | 19 | EW_p       |
|            | 20 | 0.0              | 0.1  | 0.1   | 0.1   | 0.1   | 0.0   | 0.0   | 0.0   | 0.1   | 0.1  | 0.0   | 0.1  | 0.1  | 0.1  | 0.1   | 0.1   | 0.2  | 0.1  | 0.0   | ■     | 99.9  | 20 | PLA88      |
|            | 21 | 0.1              | 0.0  | 0.0   | 0.0   | 0.0   | 0.1   | 0.1   | 0.1   | 0.0   | 0.1  | 0.1   | 0.1  | 0.1  | 0.1  | 0.0   | 0.0   | 0.3  | 0.2  | 0.1   | 0.1   | ■     | 21 | JCM_1149   |

**Fig. S2** Sequence distance of the 16S rRNA genes of *Lt. plantarum*. Strains used here are the same with those in Fig 1a. Strain names represented by the numbers 1 to 21 are listed on the right.

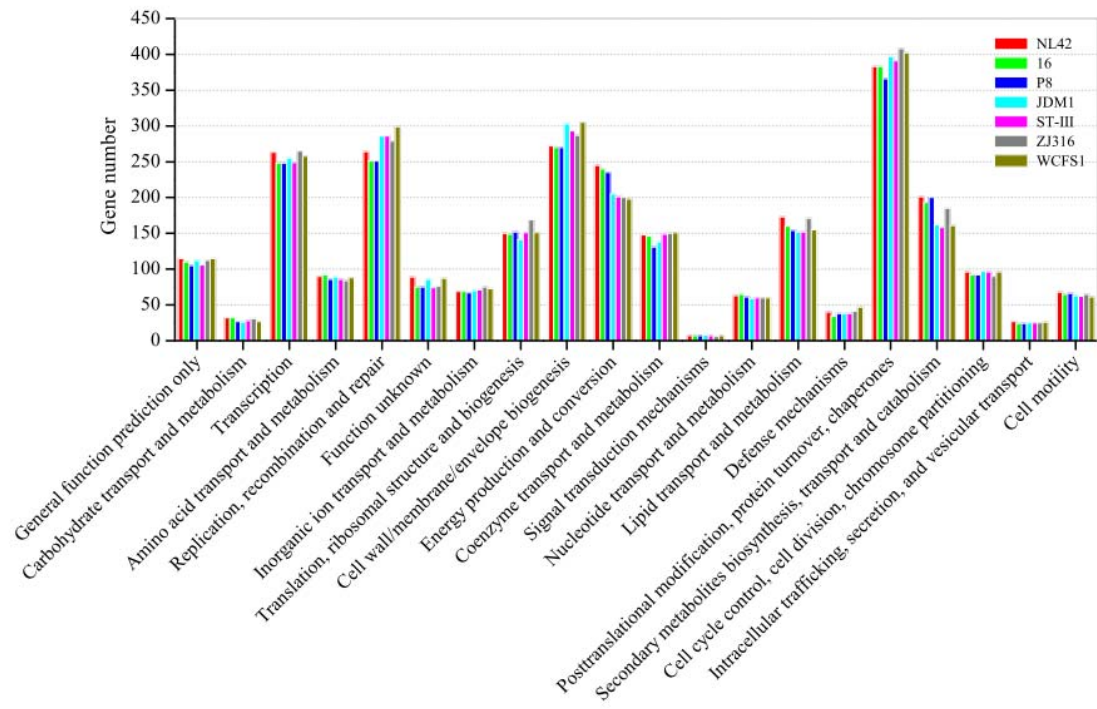

**Fig. S3** Numbers of genes assigned to different COG functional categories among *Lt. plantarum* genomes.

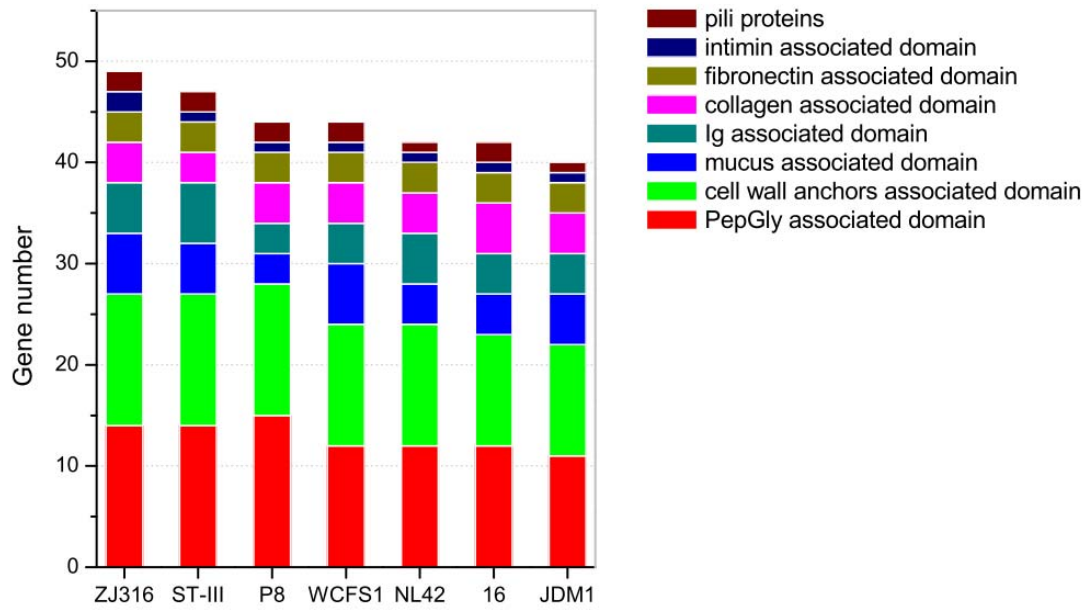

**Fig. S4** Numbers of adhesion-associated and cell wall-anchored genes in different *Lt. plantarum* strains.

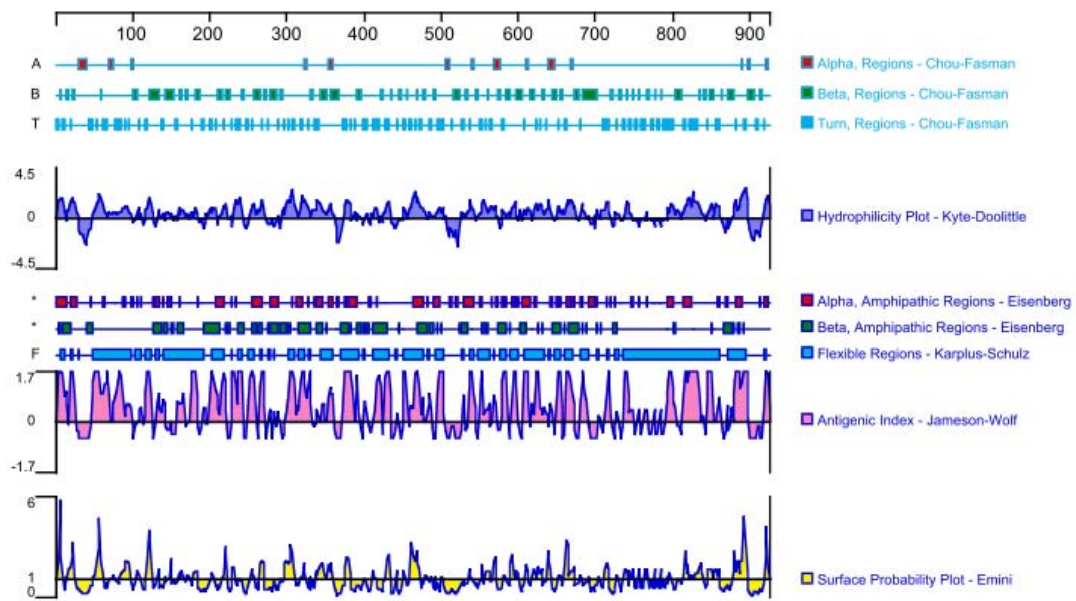

**Fig. S5** Predicted secondary structure of CwaA. The analysis was performed using Protean (Lasergene package, DNASTAR, Madison, WI, USA).

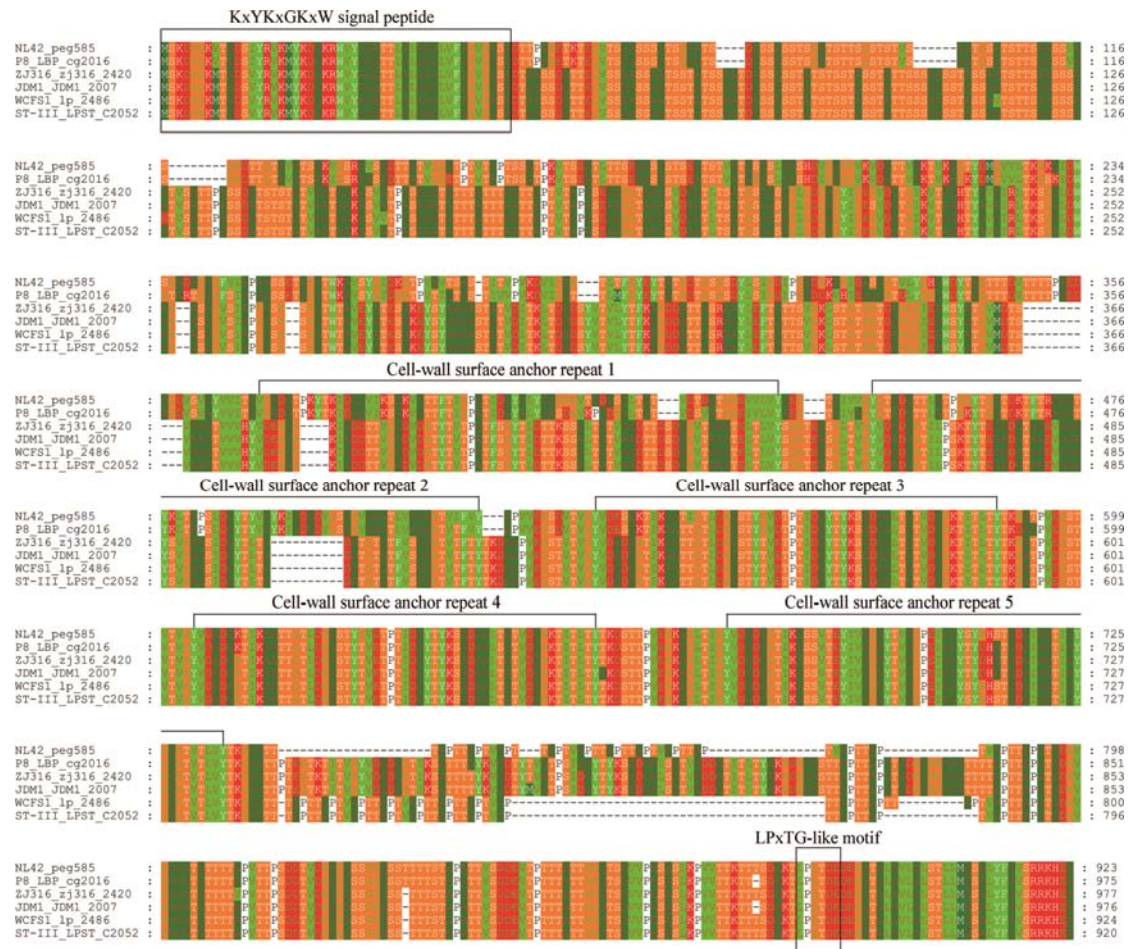

**Fig. S6** Multiple sequence alignment of *Lt. plantarum* NL42 CwaA with its homologues in other *Lt. plantarum* strain complete genomes. Regions of signal peptide, cell wall surface anchor repeats and LPxTG-like motif are labeled. NL42\_peg585 indicates CwaA.

|                                                        |                                                        |                                                        |                                                                 |                                                               |
|--------------------------------------------------------|--------------------------------------------------------|--------------------------------------------------------|-----------------------------------------------------------------|---------------------------------------------------------------|
| 1                                                      | 11                                                     | 21                                                     | 31                                                              | 41                                                            |
| MSKDNQKV <b>T</b> G                                    | DSI <b>Y</b> RVKMYK                                    | DGKR <b>W</b> VYAGA                                    | <b>T</b> TLALAAGLV                                              | FANVNASAD <b>T</b>                                            |
| 51                                                     | 61                                                     | 71                                                     | 81                                                              | 91                                                            |
| TPAN <b>E</b> TKTEQ                                    | <b>V</b> TSGASS <b>S</b> AT                            | <b>S</b> QAAT <b>S</b> DASS                            | AS <b>S</b> T <b>S</b> QAT <b>S</b> T                           | <b>T</b> SQ <b>S</b> T <b>S</b> T <b>V</b> SA                 |
| 101                                                    | 111                                                    | 121                                                    | 131                                                             | 141                                                           |
| <b>A</b> TQ <b>S</b> AT <b>S</b> <b>T</b> T <b>S</b>   | <b>A</b> ASS <b>V</b> ASQ <b>N</b> D                   | <b>T</b> TQ <b>T</b> AVAT <b>S</b> A                   | <b>K</b> VQ <b>S</b> RA <b>V</b> SAD                            | <b>T</b> TAT <b>V</b> Q <b>Q</b> AT <b>E</b>                  |
| 151                                                    | 161                                                    | 171                                                    | 181                                                             | 191                                                           |
| <b>T</b> V <b>T</b> APT <b>S</b> AT                    | <b>P</b> K <b>V</b> T <b>S</b> EAT <b>L</b> T          | <b>T</b> S <b>E</b> AAS <b>G</b> S <b>T</b> S          | <b>E</b> AT <b>S</b> T <b>V</b> AT <b>G</b> S                   | <b>G</b> SLAAS <b>H</b> D <b>V</b> N                          |
| 201                                                    | 211                                                    | 221                                                    | 231                                                             | 241                                                           |
| <b>A</b> NN <b>V</b> K <b>V</b> D <b>G</b> T <b>T</b>  | <b>V</b> A <b>K</b> T <b>V</b> K <b>G</b> Q <b>T</b> Y | <b>D</b> MQ <b>V</b> V <b>L</b> T <b>K</b> N <b>K</b>  | <b>A</b> ID <b>W</b> S <b>N</b> G <b>D</b> A <b>N</b>           | <b>G</b> Q <b>F</b> <b>V</b> I <b>A</b> P <b>A</b> G <b>S</b> |
| 251                                                    | 261                                                    | 271                                                    | 281                                                             | 291                                                           |
| <b>S</b> E <b>T</b> ANG <b>T</b> W <b>K</b> A          | <b>V</b> S <b>Y</b> Q <b>I</b> D <b>K</b> N <b>T</b> P | <b>V</b> A <b>V</b> T <b>S</b> G <b>S</b> S <b>I</b> T | <b>V</b> P <b>V</b> <b>K</b> D <b>V</b> I <b>N</b> A <b>N</b>   | <b>T</b> L <b>T</b> F <b>N</b> Y <b>E</b> Y <b>T</b> A        |
| 301                                                    | 311                                                    | 321                                                    | 331                                                             | 341                                                           |
| <b>T</b> N <b>D</b> T <b>N</b> S <b>N</b> S <b>D</b> Y | <b>L</b> S <b>I</b> N <b>D</b> I <b>P</b> N <b>A</b> D | <b>N</b> K <b>A</b> N <b>I</b> D <b>A</b> S <b>G</b> N | <b>T</b> V <b>L</b> Y <b>Q</b> H <b>G</b> W <b>D</b> Y          | <b>T</b> A <b>Q</b> T <b>T</b> T <b>D</b> V <b>T</b> T        |
| 351                                                    | 361                                                    | 371                                                    | 381                                                             | 391                                                           |
| <b>T</b> T <b>P</b> A <b>E</b> D <b>A</b> Q <b>D</b> V | <b>S</b> V <b>A</b> Y <b>V</b> V <b>I</b> T <b>G</b> V | <b>N</b> A <b>D</b> G <b>T</b> P <b>K</b> Y <b>T</b> K | <b>I</b> D <b>G</b> G <b>V</b> I <b>K</b> S <b>G</b> K          | <b>V</b> G <b>T</b> T <b>F</b> T <b>I</b> N <b>P</b> A        |
| 401                                                    | 411                                                    | 421                                                    | 431                                                             | 441                                                           |
| <b>T</b> I <b>D</b> G <b>Y</b> A <b>L</b> Y <b>G</b> A | <b>N</b> N <b>N</b> V <b>T</b> G <b>D</b> A <b>S</b> G | <b>L</b> T <b>G</b> T <b>V</b> D <b>T</b> D <b>A</b> T | <b>N</b> N <b>E</b> V <b>V</b> L <b>V</b> Y <b>A</b> E          | <b>N</b> T <b>G</b> I <b>V</b> V <b>N</b> Y <b>Q</b> I        |
| 451                                                    | 461                                                    | 471                                                    | 481                                                             | 491                                                           |
| <b>A</b> D <b>G</b> T <b>L</b> L <b>A</b> T <b>P</b> N | <b>Q</b> Y <b>T</b> Q <b>G</b> T <b>D</b> K <b>T</b> F | <b>T</b> R <b>A</b> G <b>G</b> T <b>Y</b> K <b>L</b> T | <b>A</b> P <b>S</b> L <b>D</b> G <b>Y</b> T <b>V</b>            | <b>G</b> Y <b>K</b> I <b>G</b> D <b>G</b> D <b>V</b> Q        |
| 501                                                    | 511                                                    | 521                                                    | 531                                                             | 541                                                           |
| <b>S</b> C <b>N</b> V <b>A</b> AG <b>T</b> L <b>V</b>  | <b>A</b> G <b>A</b> N <b>T</b> V <b>I</b> F <b>V</b> Y | <b>A</b> P <b>V</b> V <b>E</b> Q <b>S</b> D <b>V</b> T | <b>V</b> N <b>Y</b> V <b>D</b> E <b>S</b> G <b>K</b> T          | <b>I</b> K <b>A</b> A <b>T</b> I <b>Q</b> T <b>L</b> D        |
| 551                                                    | 561                                                    | 571                                                    | 581                                                             | 591                                                           |
| <b>N</b> G <b>S</b> T <b>Y</b> N <b>V</b> D <b>T</b> P | <b>T</b> I <b>D</b> G <b>Y</b> T <b>Y</b> K <b>S</b> A | <b>D</b> A <b>A</b> L <b>T</b> G <b>T</b> V <b>D</b> G | <b>N</b> K <b>T</b> I <b>T</b> L <b>T</b> Y <b>T</b> K          | <b>N</b> A <b>T</b> P <b>V</b> E <b>Q</b> S <b>T</b> V        |
| 601                                                    | 611                                                    | 621                                                    | 631                                                             | 641                                                           |
| <b>T</b> V <b>N</b> Y <b>V</b> D <b>A</b> D <b>G</b> K | <b>T</b> I <b>K</b> A <b>A</b> T <b>T</b> Q <b>T</b> L | <b>D</b> N <b>G</b> S <b>T</b> Y <b>N</b> V <b>D</b> T | <b>P</b> T <b>I</b> D <b>G</b> Y <b>T</b> Y <b>K</b> S          | <b>A</b> D <b>A</b> A <b>L</b> T <b>G</b> T <b>V</b> D        |
| 651                                                    | 661                                                    | 671                                                    | 681                                                             | 691                                                           |
| <b>G</b> N <b>K</b> T <b>I</b> T <b>L</b> T <b>Y</b> T | <b>K</b> D <b>S</b> T <b>T</b> P <b>V</b> E <b>N</b> K | <b>A</b> N <b>L</b> T <b>I</b> N <b>Y</b> V <b>D</b> A | <b>D</b> G <b>N</b> T <b>I</b> K <b>A</b> S <b>S</b> V          | <b>T</b> E <b>Y</b> I <b>V</b> G <b>Q</b> A <b>Y</b> T        |
| 701                                                    | 711                                                    | 721                                                    | 731                                                             | 741                                                           |
| <b>V</b> G <b>Q</b> P <b>E</b> I <b>A</b> G <b>Y</b> S | <b>Y</b> N <b>H</b> S <b>T</b> G <b>D</b> A <b>I</b> A | <b>G</b> T <b>I</b> G <b>Y</b> N <b>G</b> N <b>T</b> V | <b>T</b> L <b>V</b> Y <b>T</b> K <b>N</b> G <b>G</b> T          | <b>T</b> T <b>A</b> P <b>T</b> T <b>A</b> P <b>T</b> V        |
| 751                                                    | 761                                                    | 771                                                    | 781                                                             | 791                                                           |
| <b>A</b> P <b>T</b> T <b>A</b> P <b>T</b> V <b>A</b> P | <b>T</b> T <b>A</b> P <b>T</b> T <b>A</b> P <b>T</b> V | <b>A</b> P <b>T</b> T <b>A</b> P <b>T</b> V <b>A</b> P | <b>T</b> T <b>A</b> P <b>T</b> V <b>A</b> P <b>T</b> T          | <b>A</b> P <b>G</b> T <b>G</b> D <b>N</b> V <b>N</b> G        |
| 801                                                    | 811                                                    | 821                                                    | 831                                                             | 841                                                           |
| <b>G</b> G <b>T</b> G <b>T</b> T <b>T</b> T <b>A</b> P | <b>V</b> I <b>T</b> P <b>S</b> D <b>D</b> T <b>V</b> D | <b>N</b> G <b>N</b> G <b>S</b> S <b>N</b> N <b>G</b> S | <b>S</b> T <b>I</b> T <b>T</b> T <b>S</b> T <b>A</b> P <b>A</b> | <b>T</b> T <b>V</b> S <b>D</b> D <b>E</b> V <b>T</b> P        |
| 851                                                    | 861                                                    | 871                                                    | 881                                                             | 891                                                           |
| <b>T</b> T <b>T</b> A <b>T</b> T <b>N</b> N <b>G</b> T | <b>S</b> G <b>V</b> V <b>P</b> A <b>S</b> A <b>S</b> L | <b>K</b> E <b>V</b> V <b>T</b> T <b>K</b> T <b>T</b> T | <b>S</b> D <b>A</b> K <b>T</b> L <b>E</b> Q <b>T</b> D          | <b>E</b> D <b>E</b> N <b>G</b> T <b>A</b> L <b>A</b> V        |
| 901                                                    | 911                                                    | 921                                                    |                                                                 |                                                               |
| <b>L</b> G <b>L</b> S <b>T</b> L <b>L</b> M <b>G</b> S | <b>A</b> L <b>Y</b> F <b>G</b> V <b>S</b> R <b>R</b> K | <b>H</b> E <b>A</b>                                    |                                                                 |                                                               |

**Legend:**

The conservation scale:

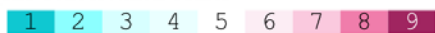

Variable | Average | Conserved

**X** - Insufficient data - the calculation for this site was performed on less than 10% of the sequences.

**Fig. S7** Analysis of the evolutionary conservation of amino acids in CwaA using the web server ConSurf (<http://consurf.tau.ac.il/>).



**Table S1 Bacterial strains and plasmids used in this study**

| Strains/plasmids                              | Relevant characteristics                                                                                          | Source or reference |
|-----------------------------------------------|-------------------------------------------------------------------------------------------------------------------|---------------------|
| <i>Lt. plantarum</i> NL42                     | Isolate from cheese                                                                                               | Zuo et al. 2014     |
| <i>Lc. lactis</i> NZ9000                      | MG1363 <i>pepN::nisRK</i>                                                                                         | Kuipers et al. 1998 |
| <i>Lc. lactis</i> NZ9000-401                  | <i>Lc. lactis</i> NZ9000<br>harboring empty vector<br>pNZ401                                                      | This study          |
| <i>Lc. lactis</i> NZ9000-401- <i>cwaA</i>     | <i>Lc. lactis</i> NZ9000<br>harboring pNZ401- <i>cwaA</i>                                                         | This study          |
| <i>E. coli</i> DH5 $\alpha$                   | Cloning host                                                                                                      | Takara              |
| <i>E. coli</i> DH5 $\alpha$ -401              | <i>E. coli</i> DH5 $\alpha$ harboring<br>empty vector pNZ401                                                      | Laboratory stock    |
| <i>E. coli</i> DH5 $\alpha$ -401- <i>cwaA</i> | <i>E. coli</i> DH5 $\alpha$ harboring<br>pNZ401- <i>cwaA</i>                                                      | This study          |
| <i>E. coli</i> H10407 (ETEC) ATCC<br>35401    | Enterotoxigenic <i>E. coli</i><br>strain                                                                          | ATCC <sup>1</sup>   |
| <i>S. aureus</i> ATCC 25923                   | Quality control strain                                                                                            | CGMCC               |
| pNZ401                                        | Em <sup>r</sup> , inducible expression<br>vector containing the<br><i>nisA</i> promoter, derivative<br>of pNZ8048 | Laboratory stock    |
| pNZ401- <i>cwaA</i>                           | pNZ401 carrying <i>cwaA</i><br>gene                                                                               | This study          |

<sup>1</sup><http://www.atcc.org/products/all/35401.aspx>
